# Supplementary material
Source: Springer Nature journal article supplement (https://www.springermedizin.de/resource/supplementary/12885_2013_4713_MOESM9_ESM.pdf/9467106)

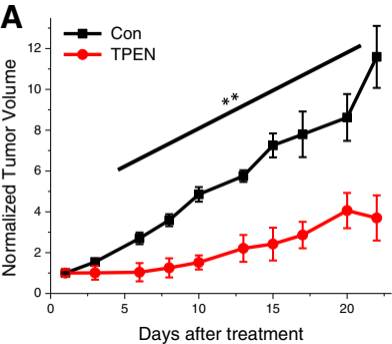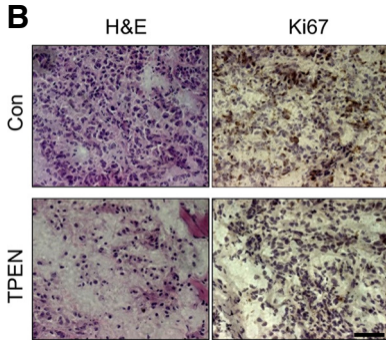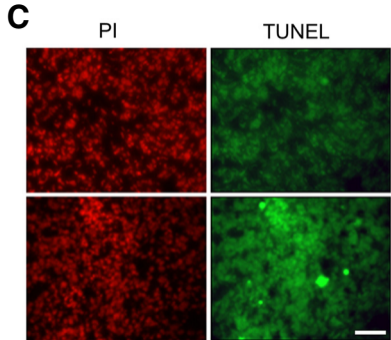

Supplement: MOESM9 [file 9467106]
